# Supplementary material
Source: PubMed Central journal article supplement (PMC4635667)

Frequency plot of TCGA cases with age at operation < 35 years  
(n=113)

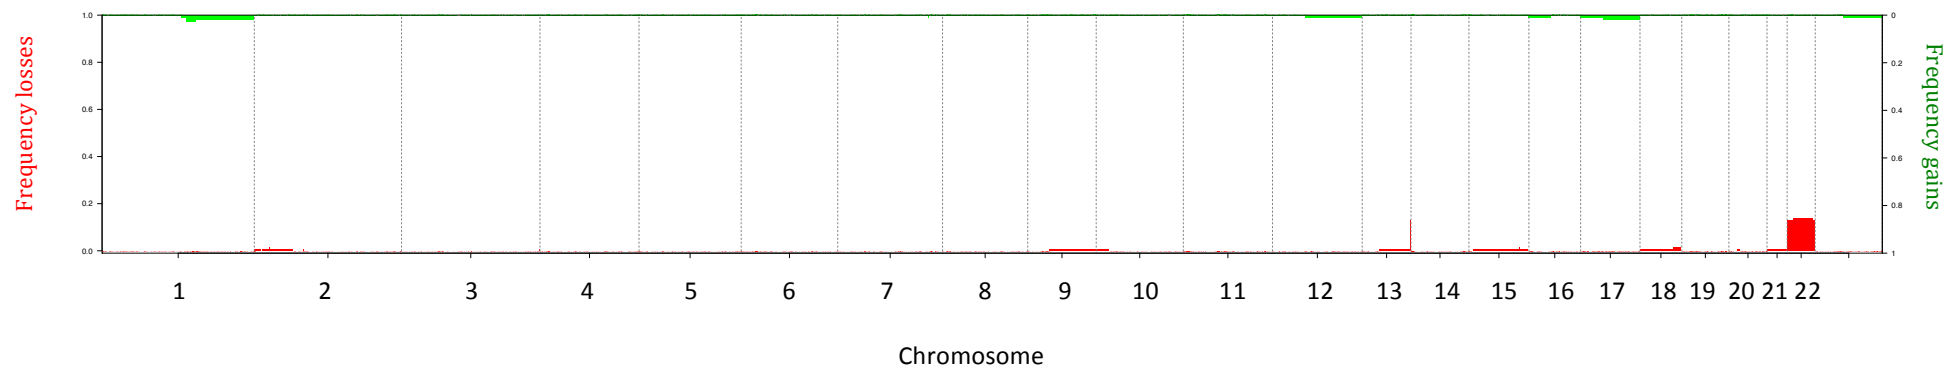

Supplement: supp_bgv119_SI_Fig2.pdf [file supp_bgv119_SI_Fig2.pdf]
